# Supplementary material for: Combination Therapy with Bispecific Antibodies and PD-1 Blockade Enhances the Antitumor Potency of T Cells
Source: Oxford University Press journal article supplement (doi:10.1158/0008-5472.can-16-3431), 2017-08-17
Supplement: 00085472can163431-sup-176175_3_supp_4187538_2ttd7f.docx [file 00085472can163431-sup-176175_3_supp_4187538_2ttd7f.docx]

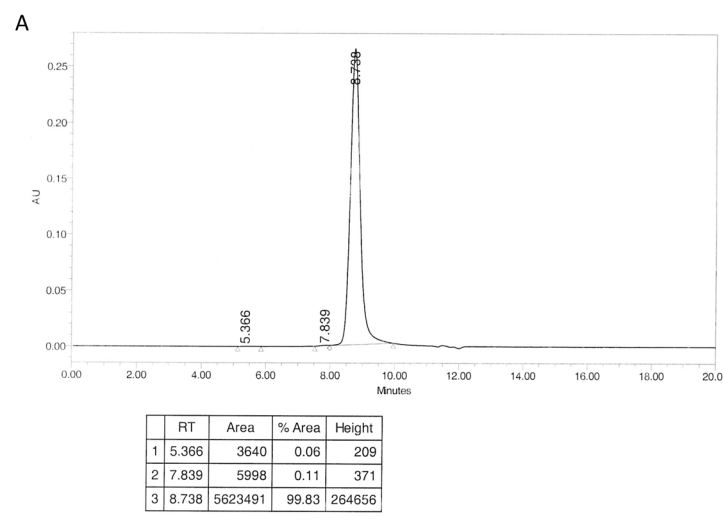

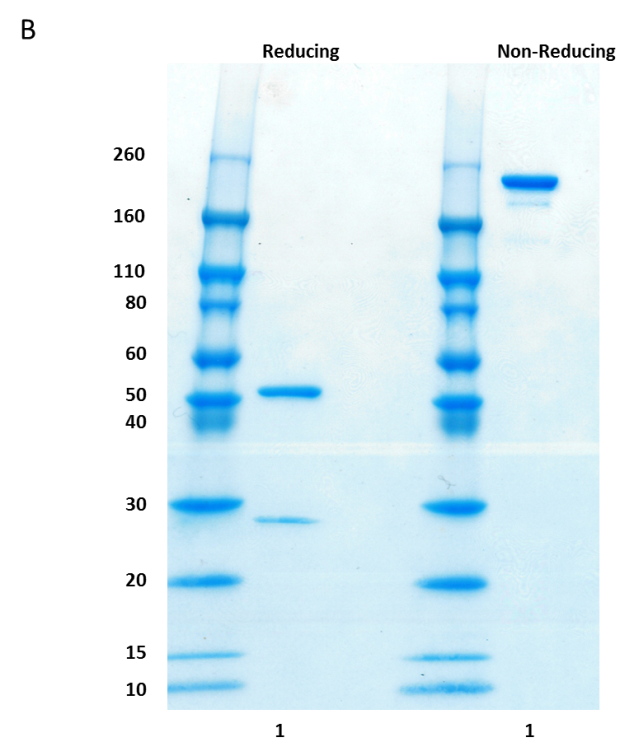


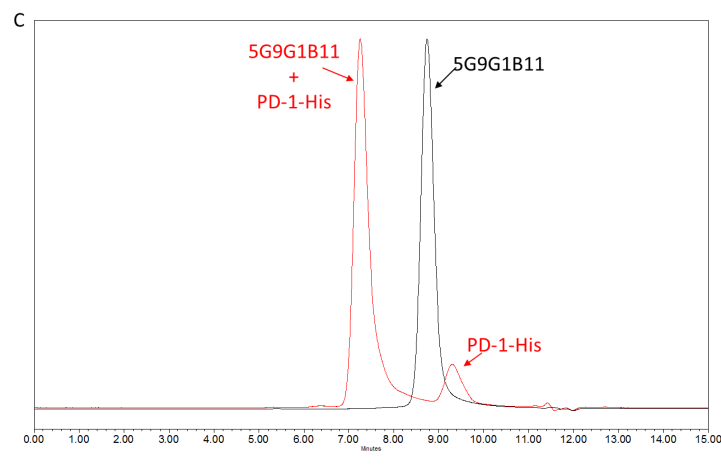

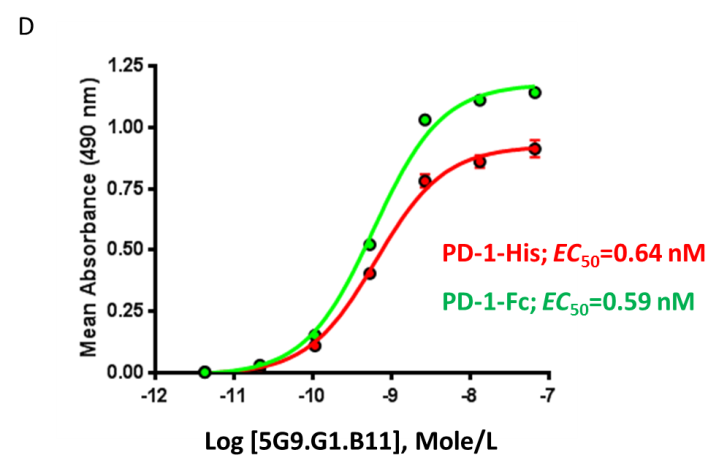


**Fig. S1**. **Biochemical characterization of 5G9.G1.B11**. (A) SE-HPLC analysis; (B) SDS-PAGE analysis; (C) reactivity with human PD-1-His by SE-HPLC; (D) binding affinity to human PD-1-His or human PD-1-Fc by ELISA.


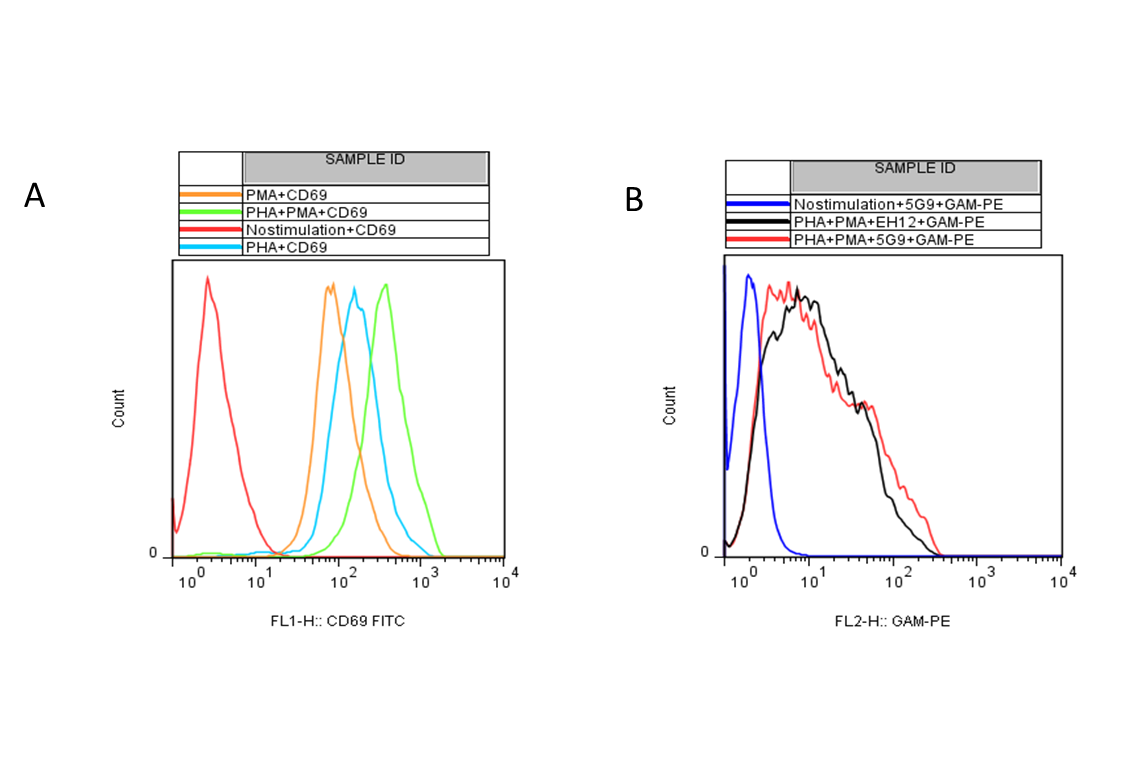


**Fig. S2**. **Binding of 5G9.G1.B11 to native PD-1.** Jurkat cells (5 x 105/mL, 5 mL) in T-25 flasks were stimulated with phytohaemagglutinin (PHA;1 μg/mL), phorbol myristate acetate (PMA; 50 ng/mL) or both, for 48 h, stained with anti-CD69 and anti-PD-1 antibodies, and analyzed by flow cytometry. (A) The increased expression of the early T-cell activation marker CD69 was shown for Jurkat cells stimulated with PMA (orange histogram), PHA (blue histogram) and both (green histogram). (B) Binding of PD-1 on Jurkat cells stimulated with both PMA and PHA was shown for 5G9.G1.B11 and a commercial anti-PD-1 (EH12) to a similar extent.


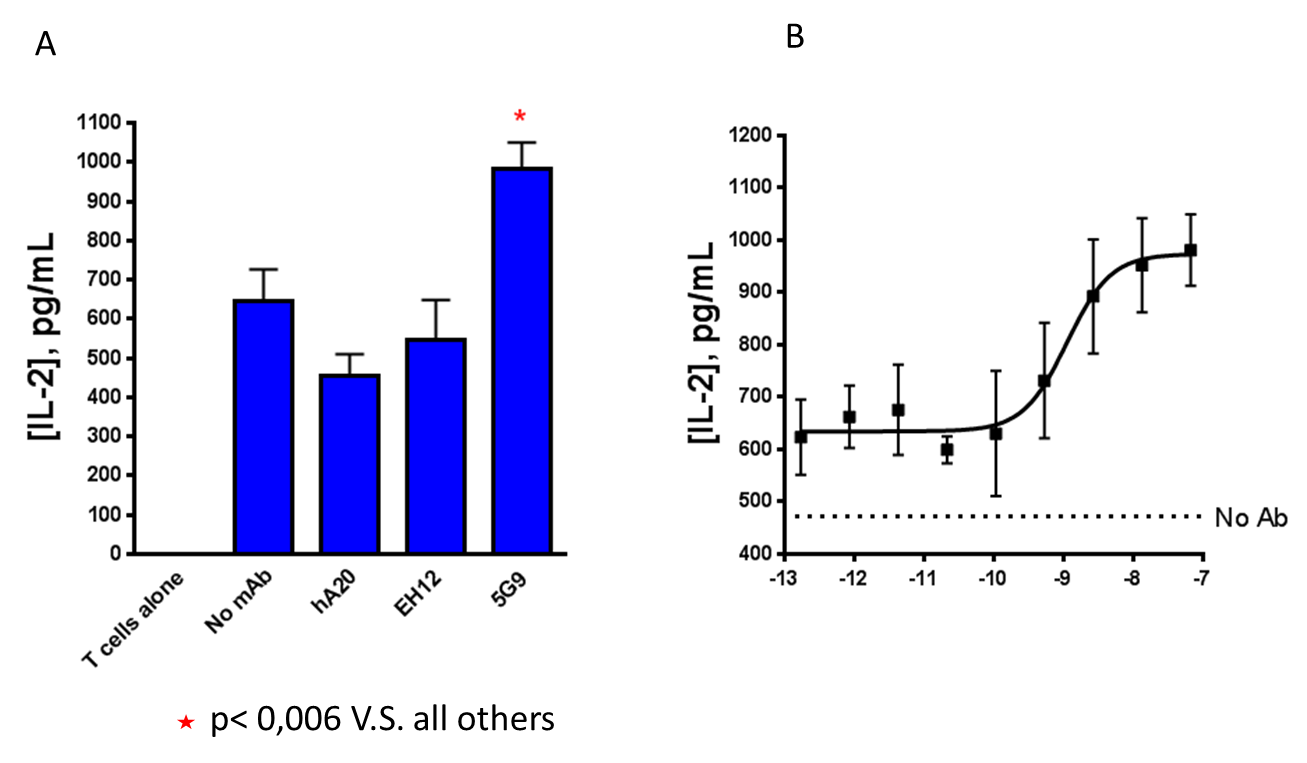


* P<0.006 vs. the three controls (No mAb, hA20, and EH12)

**Fig. S3**. **Blocking activities of 5G9.G1.B11.** Dendritic cells (DCs) and T cells from different donors were co-cultured with and without 5G9.G1.B11 in a mixed lymphocyte reaction. (A) 5G9.G1.B11 enhanced IL-2 secretion over the three controls (*P*< 0.006). (B) The increase of IL-2 by 5G9.G1.B11 was dose-dependent.


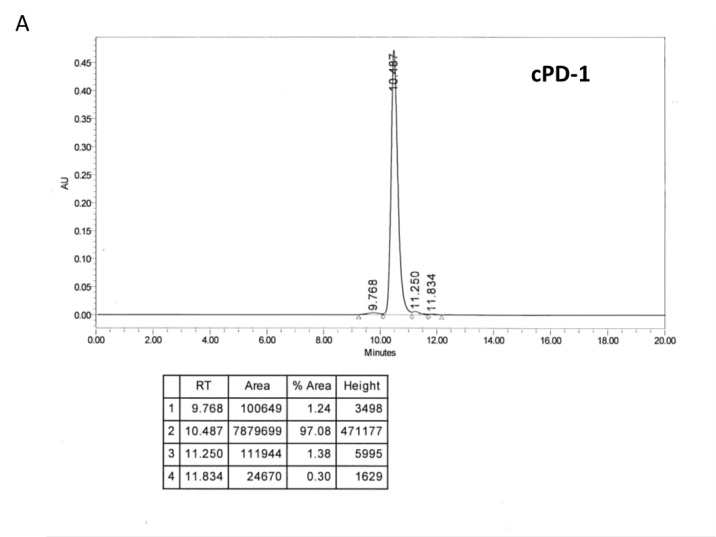

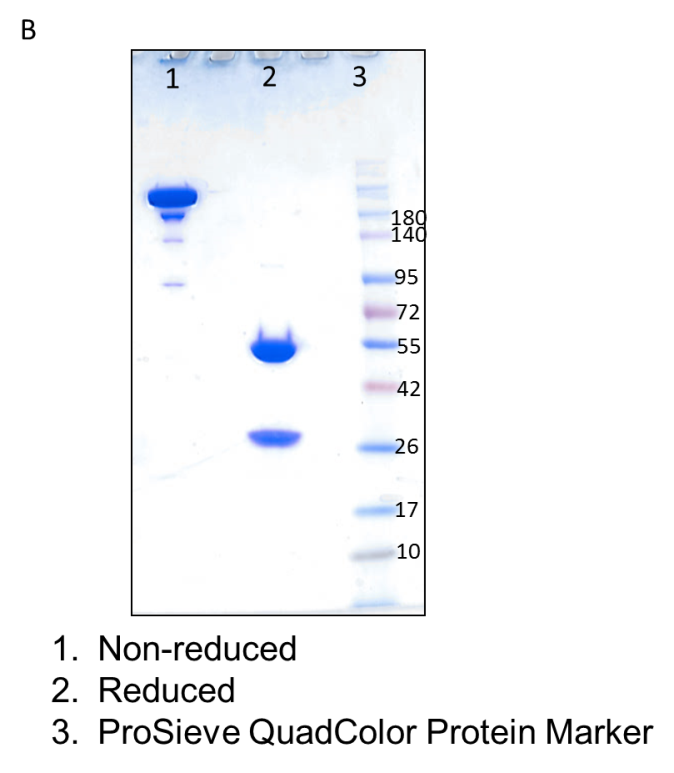


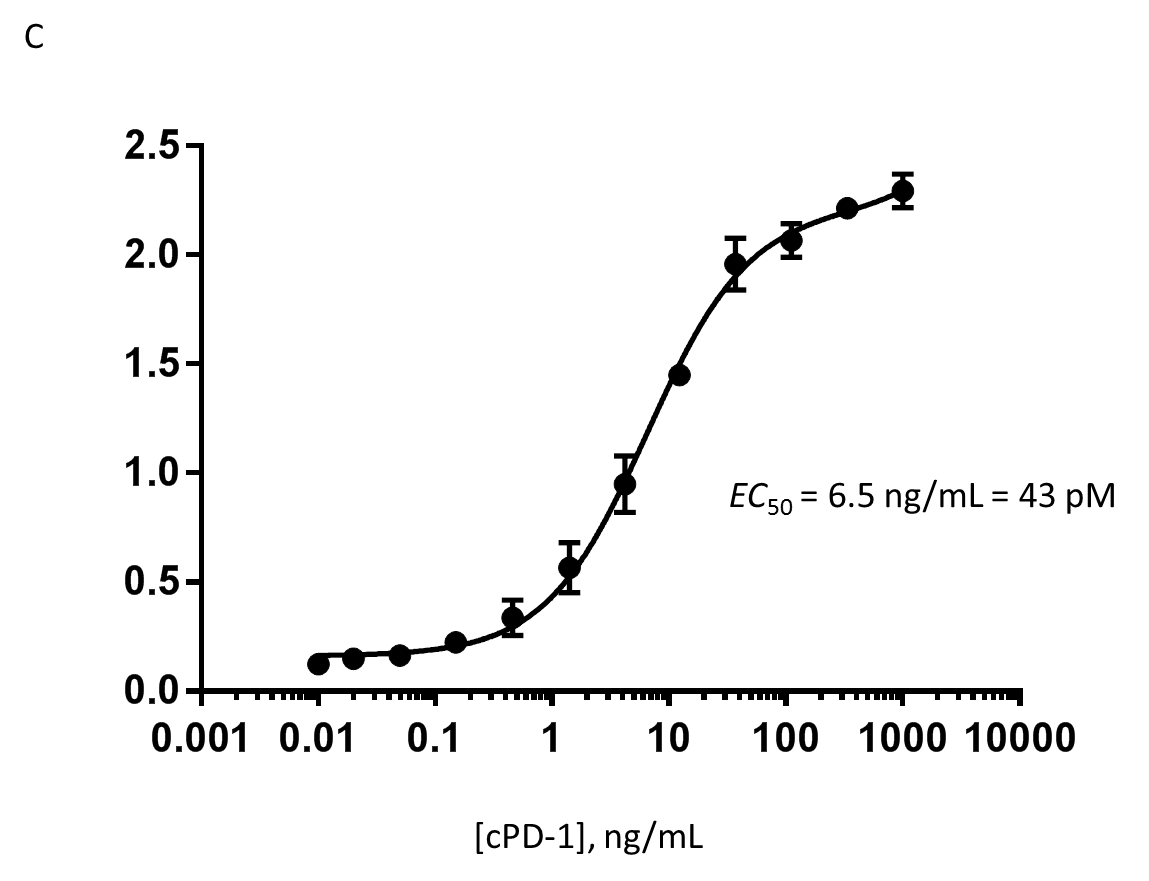


OD490

**Fig. S4. Biochemical characterization of cPD-1.** (A) SE-HPLC analysis; (B) SDS-PAGE analysis; (C) binding to human PD-1-His by ELISA.


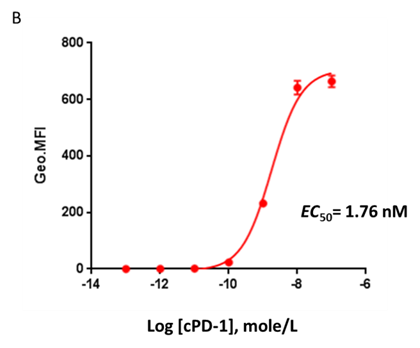


**B**

**A**


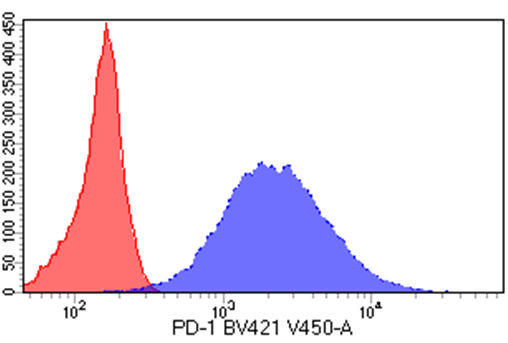


**count**

**Fig. S5**. **Binding of cPD-1 to SpESF-X10-2D1 cells transfected to overexpress human PD-1.** (A) Affinity of cPD-1 for human PD-1 on the surface of SpESF-X10-2D1; (B) Expression of human PD-1 on SpESF-X10-2D1.
