# Supplementary material for: Combination Therapy with Bispecific Antibodies and PD-1 Blockade Enhances the Antitumor Potency of T Cells
Source: Oxford University Press journal article supplement (doi:10.1158/0008-5472.can-16-3431), 2017-08-17
Supplement: 00085472can163431-sup-176175_3_supp_4187543_ww0l5l.docx [file 00085472can163431-sup-176175_3_supp_4187543_ww0l5l.docx]

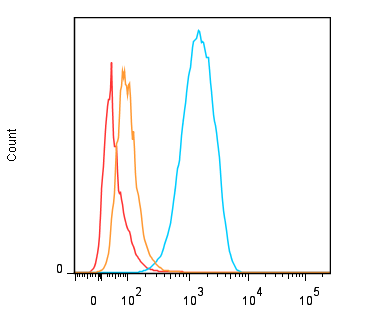


**PE-anti-PD-L1**

**MDA-MB-231**

**BxPC3**

**NCI-N87**

| **Cell line** | **Geometric Mean FI** | | |
| --- | --- | --- | --- |
|  | **-** | **PE-Isotype control** | **PE-anti-PD-L1** |
| **MDA-MB-231** | **65** | **65; 65** | **1239; 1259** |
| **BxPC-3** | **17** | **21; 23** | **91; 94** |
| **MCI-N87** | **11** | **16; 16** | **42; 43** |

Fig. S7. Expression of PD-L1 on MDA-MB-231, BxPC-3 and NCI-M87, as determined by flow cytometry.
