# Supplementary material for: Combination Therapy with Bispecific Antibodies and PD-1 Blockade Enhances the Antitumor Potency of T Cells
Source: Oxford University Press journal article supplement (doi:10.1158/0008-5472.can-16-3431), 2017-08-17
Supplement: 00085472can163431-sup-176175_3_supp_4187545_kttd7f.docx [file 00085472can163431-sup-176175_3_supp_4187545_kttd7f.docx]

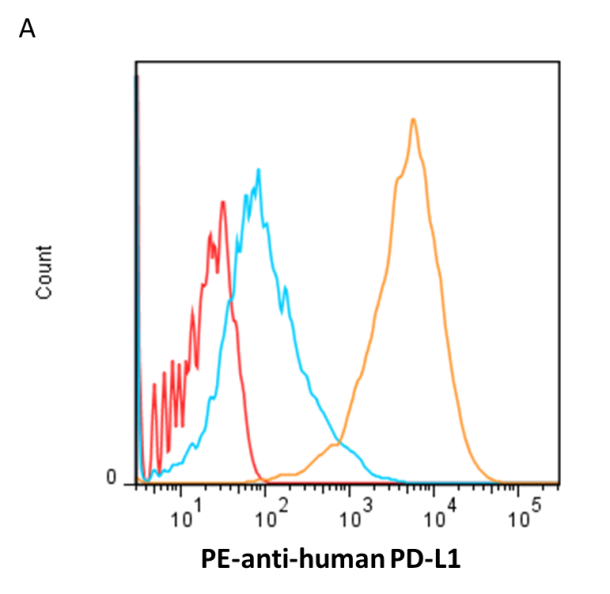

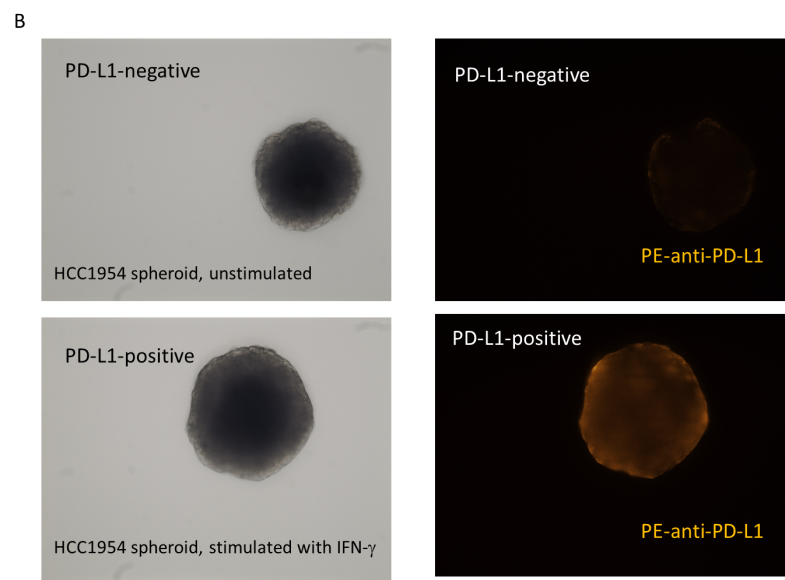


**Fig. S8**. **Upregulation of PD-L1on HCC1954 cells by IFN-γ.** (A) HCC1954 cells were stimulated with IFN-γ (20 ng/mL) for 48 h and stained with PE-conjugated anti-human PD-L1 (orange histogram). Unstimulated HCC1954 cells were stained with PE-conjugated anti-human PD-L1 (blue histogram) or PE-conjugated isotype control. (B) Prominent staining of PD-L1 was observed in HCC1954 spheroids following IFN-γ stimulation, with phase-contrast and immunofluorescence images shown in the left and right columns, respectively.
